# Supplementary material for: Fetal Cardiac Services during the COVID-19 Pandemic: How Does It Affect Parental Counseling?
Source: MDPI journal article supplement (doi:10.3390/jcm10153423), 2021-07-31
Supplement: s1 [file s1]

**Table S1.** Overview of fetal cardiac diagnoses and associated chromosomal or extracardiac anomalies.

| Fetal cardiac diagnosis                                               | Genetic or extracardiac findings |
|-----------------------------------------------------------------------|----------------------------------|
| ASD II                                                                | Trisomy 21                       |
| Aortic stenosis, aortic arch hypoplasia, perimembranous VSD           |                                  |
| Aortic stenosis, coarctation                                          |                                  |
| ASD, LSVC                                                             | Trisomy 21                       |
| AVSD                                                                  | Trisomy 21                       |
| AVSD                                                                  |                                  |
| AVSD                                                                  | Trisomy 21                       |
| AVSD                                                                  |                                  |
| AVSD                                                                  |                                  |
| AVSD                                                                  | Trisomy 21                       |
| AVSD                                                                  |                                  |
| AVSD                                                                  | Trisomy 21                       |
| AVSD                                                                  |                                  |
| AVSD                                                                  | Trisomy 21                       |
| AVSD                                                                  |                                  |
| AVSD                                                                  | Trisomy 21                       |
| AVSD                                                                  | Trisomy 21                       |
| AVSD, ARSA                                                            | Trisomy 21                       |
| AVSD, hypoplastic aortic arch, coarctation                            |                                  |
| AVSD, TOF                                                             | Trisomy 21                       |
| Borderline left ventricle, hypoplastic aortic arch, coarctation, LSVC |                                  |
| ccTGA                                                                 |                                  |
| ccTGA                                                                 |                                  |
| Coarctation                                                           | Turner syndrome                  |
| Coarctation                                                           |                                  |
| Coarctation, ARSA                                                     |                                  |
| Complex TGA                                                           |                                  |
| Critical aortic stenosis                                              |                                  |
| Critical aortic stenosis, severe mitral regurgitation, coarctation    |                                  |
| Critical pulmonary stenosis, severe tricuspid regurgitation           |                                  |

|                                                                                                 |                                      |
|-------------------------------------------------------------------------------------------------|--------------------------------------|
| DILV, MGA, aortic arch hypoplasia                                                               |                                      |
| DILV, MGA, aortic arch hypoplasia, bilateral SVC                                                |                                      |
| DORV                                                                                            |                                      |
| DORV                                                                                            |                                      |
| DORV                                                                                            |                                      |
| DORV                                                                                            |                                      |
| DORV, aortic arch hypoplasia, coarctation                                                       |                                      |
| DORV, MGA, right aortic arch, hypoplastic aortic arch, coarctation                              |                                      |
| DORV, subpulmonary stenosis                                                                     |                                      |
| DORV, TGA                                                                                       |                                      |
| DORV, TGA, PA                                                                                   |                                      |
| DORV, TGA, subpulmonary stenosis                                                                |                                      |
| DORV, TOF type, right aortic arch, MAPCA                                                        |                                      |
| Ebstein's anomaly of the tricuspid valve                                                        |                                      |
| Ebstein's anomaly of the tricuspid valve                                                        |                                      |
| Heterotaxy syndrome, AVSD, absent right AV connection, pulmonary stenosis, MGA, bilateral SVCs  | Situs inversus abdominalis, asplenia |
| Heterotaxy syndrome, AVSD, pulmonary stenosis, MGA, right aortic arch                           |                                      |
| Heterotaxy syndrome, dextrocardia, DORV, pulmonary stenosis, MGA                                |                                      |
| Heterotaxy syndrome, HLHS, TAPVR, azygos continuation                                           |                                      |
| HLHS                                                                                            |                                      |
| HLHS, DORV                                                                                      |                                      |
| HLHS, VSD                                                                                       |                                      |
| Hydrops, tricuspid regurgitation                                                                |                                      |
| Hypoplastic aortic arch                                                                         |                                      |
| Hypoplastic aortic arch                                                                         |                                      |
| Hypoplastic aortic arch, borderline LV                                                          |                                      |
| Hypoplastic aortic arch, coarctation                                                            |                                      |
| Hypoplastic aortic arch, coarctation                                                            |                                      |
| Hypoplastic aortic arch, perimembranous VSD                                                     |                                      |
| Hypoplastic aortic arch, VSD                                                                    | *MCAD                                |
| Hypoplastic aortic arch, VSD muscular, PAPVR                                                    |                                      |
| IAA, borderline left ventricle                                                                  | DiGeorge-syndrome                    |
| IAA, VSD                                                                                        |                                      |
| LAI, dextrocardia, hypoplastic right ventricle, tricuspid atresia, pulmonary stenosis, VSD, MGA |                                      |
| LSVC                                                                                            |                                      |
| Non-compaction cardiomyopathy                                                                   |                                      |

|                                                                                  |                                                                                  |
|----------------------------------------------------------------------------------|----------------------------------------------------------------------------------|
| PA, IVS                                                                          |                                                                                  |
| PA, IVS                                                                          |                                                                                  |
| PA, IVS, bipartite right ventricle, right ventricular hypertrophy                |                                                                                  |
| PA, IVS, sinusoids                                                               |                                                                                  |
| PA, VSD                                                                          |                                                                                  |
| PA, VSD, MAPCAs                                                                  |                                                                                  |
| PA, VSD, TGA                                                                     |                                                                                  |
| Pulmonary stenosis                                                               |                                                                                  |
| Right aortic arch                                                                |                                                                                  |
| Severe aortic stenosis                                                           |                                                                                  |
| Severe Ebstein's anomaly of the tricuspid valve                                  |                                                                                  |
| Severe pulmonary stenosis, severe tricuspid regurgitation                        |                                                                                  |
| Suspicion for coarctation, ventricular disproportion                             |                                                                                  |
| Suspicion for coarctation, ventricular disproportion                             |                                                                                  |
| TGA                                                                              |                                                                                  |
| TGA (simple)                                                                     |                                                                                  |
| TOF                                                                              | Trisomy 21                                                                       |
| TOF                                                                              |                                                                                  |
| TOF, right aortic arch                                                           | DiGeorge-syndrome                                                                |
| Tricuspid atresia                                                                |                                                                                  |
| Tricuspid atresia                                                                |                                                                                  |
| Tricuspid atresia Ib                                                             |                                                                                  |
| Tricuspid valve dysplasia, moderate regurgitation, mild pulmonary stenosis, LSVc | Trisomy 21                                                                       |
| Tricuspid valve dysplasia, prenatal duct closure                                 |                                                                                  |
| VSD                                                                              | renal agenesis                                                                   |
| VSD                                                                              |                                                                                  |
| VSD                                                                              |                                                                                  |
| VSD                                                                              |                                                                                  |
| VSD                                                                              |                                                                                  |
| VSD                                                                              | *Reciprocal translocation chromosome 1 and 7; deletions: 1q43 and 7p15.3 - p21.1 |

|                                                 |                  |
|-------------------------------------------------|------------------|
| VSD                                             | *Cystic fibrosis |
| VSD inlet                                       |                  |
| VSD muscular                                    |                  |
| VSD perimembranous                              |                  |
| VSD, hypoplastic aortic arch, coarctation, LSCV |                  |

\*postnatal diagnosis

**Abbreviations (in alphabetical order):**

ARSA - aberrant right subclavian artery  
 AV - atrioventricular  
 ASD - atrial septal defect  
 AVSD - atrioventricular septal defect  
 CC - congenitally corrected  
 DORV - double outlet right ventricle  
 HLHS - hypoplastic left heart syndrome  
 IAA - interrupted aortic arch  
 IVS - intact ventricular septum  
 LAI - left atrial isomerism  
 LSCV - left superior vena cava  
 MAPCAs - main aortopulmonary collateral arteries  
 MCAD - medium-chain acyl-CoA dehydrogenase deficiency  
 MGA - malposition of the great arteries  
 PA - pulmonary atresia  
 PAPVR/TAPVR - partial or total anomalous pulmonary venous return  
 TGA - transposition of the great arteries  
 TOF - tetralogy of Fallot  
 VSD - ventricular septal defect
